# Supplementary material for: Enhanced 3D Breast Cancer Detection in Mammograms: Iterative Closest Point and Linde-Buzo-Gray Algorithm Fusion
Source: Research Square preprint supplement (doi:10.21203/rs.3.rs-6695098/v1), 2025-05-30
Supplement: Supplementary file 1 [file b65ba7b7f3628bc42fc8d651.docx]

Table 1. Compared to previous research that used mammography images to diagnose breast cancer.

| Author(s) | Datasets | Algorithms | Results |
| --- | --- | --- | --- |
| [16] | Data System (BI-RADS) | CAD system | 91.6% |
| [17] | database (INbreast) | Dual-View, ML | 90% |
| [18] | Mammography (DDSM) | content-based image retrieval (CBIR), SVM | 81% |
| [19] | MIAS, Mammographic Image | ANN, Naive Bayes, SVM | 100% 92% 94% |
| [20] | IRMA database | SVM | 94.11% |
| [21] | WBCD | ANN | 98.9% |
| [22] | mini-MIAS, DDSM | SVM with RBF kernel | 80% |
| [23] | Mammography (DDSM) | PCA, SVM | 96%, 98% |
| [24] | Privet dataset | DWT, SVM | 91% |

Table 2. Part of code ICP algorithm 3D images

| ICP Algorithm |
| --- |
| **%% Run ICP (standard settings)**  [Ricp Ticp ER t] = icp(M, D, 15);  % Transform data-matrix using ICP result  Dicp = Ricp * D + repmat(Ticp, 1, n);  **% Plot model points blue and transformed points red**  **figure;**  subplot(2,2,1);  plot3(M(1,:),M(2,:),M(3,:),'bo',D(1,:),D(2,:),D(3,:),'r.');  axis equal;  xlabel('x'); ylabel('y'); zlabel('z');  title(' transformed point ');  **%% Run ICP (fast kDtree matching and extrapolation)**  [Ricp Ticp ER t] = icp(M, D, 15, 'Matching', 'kDtree', 'Extrapolation', true);  % Transform data-matrix using ICP result  Dicp = Ricp * D + repmat(Ticp, 1, n);  **% Plot model points blue and transformed points red**  **figure;**  subplot(2,2,1);  plot3(M(1,:),M(2,:),M(3,:),'bo',D(1,:),D(2,:),D(3,:),'r.');  axis equal;  xlabel('x'); ylabel('y'); zlabel('z');  title('EICP transformed point'); |

Table 3. Mechanism of selecting and distributing samples from the Private dataset.

| **No. of Selected Image** | **Malignant** | | **Benign** | | **Normal** | |
| --- | --- | --- | --- | --- | --- | --- |
| **1020 Images selected randomly** | 532 | | 468 | | 20 | |
| Training | Testing | Training | Testing | Training | Testing |
| 372 | 160 | 326 | 142 | 14 | 6 |

Table 4. Confusion matrix for the proposed method

| Predicted | Actual | | |
| --- | --- | --- | --- |
| Positive | TP = 532 | FP = 10 |
| Negative | FN = 16 | TN = 462 |

Table 5. The performance measures of the proposed algorithm for the private train dataset

| Features | Sensitivity | Specificity | Accuracy | Precision | F1 score |
| --- | --- | --- | --- | --- | --- |
| Region-based features | 97% | 97.8% | 97.4% | 98% | 97.5% |

Table 6. The performance measures of the proposed algorithm for the private test dataset

| Features | Sensitivity | Specificity | Accuracy | Precision | F1 score |
| --- | --- | --- | --- | --- | --- |
| Region-based features | 95% | 95.8% | 95.4% | 97% | 96% |

Table 7. Comparison with existing methods.

| **Ref.** | **Dataset** | **Methodology** | **Features** | **Classification Accuracy** |
| --- | --- | --- | --- | --- |
| [35] | Mammographic Image Analysis Society (MIAS) | SVM | 324 digital mammogram images | 87.1% |
| [36] | Labelled (DDSM) dataset  CBIS-DDSM dataset | DCNN, SVM  DCNN, SVM | 2,256  5,272 | 71.01% , 80.5%  73.6%., 87.2% |
| [37] | MIAS | KNN | Gray level cooccurrence matrix (GLCM) | 86.1% |
| [38] | Wisconsin diagnostic breast cancer (WDBC) | SL, SSL  K-NN, Logistics regression | 30 attributes of 569 patients with 569 instances | K-NN (SL=98% & SSL= 97%) and logistics regression (SL = 97% & SSL =98%) |
| [39] | MIAS mammogram image dataset | KNN, NB, and RF | 307 | 94.5%, 95.8%, and 96.2% |
| [40] | open-access mini-MIAS | SVM, RF, ANN, k-NN, NB and DT | 322 digitized mammography images | 1.000, 0.989, 0.991, 0.742, 0.979 and 0.969 |
| [41] | IRMA | SVM classification for  WA-GSA, Gabor and GLCM | 9,852 include normal, benign, and cancerous cases. | 95.71, 93.57 and 91.07 |
| Proposed model | Private dataset | ICP, ECP, LBG | 1020 Digital image Mammography | 97.4% |
